# Supplementary material
Source: Springer Nature journal article supplement (https://www.springermedizin.de/resource/supplementary/12881_2010_797_MOESM2_ESM.pdf/9451434)

22.599.250 22.599.350 22.599.450 22.599.550 22.599.650 22.599.750 22.599.850

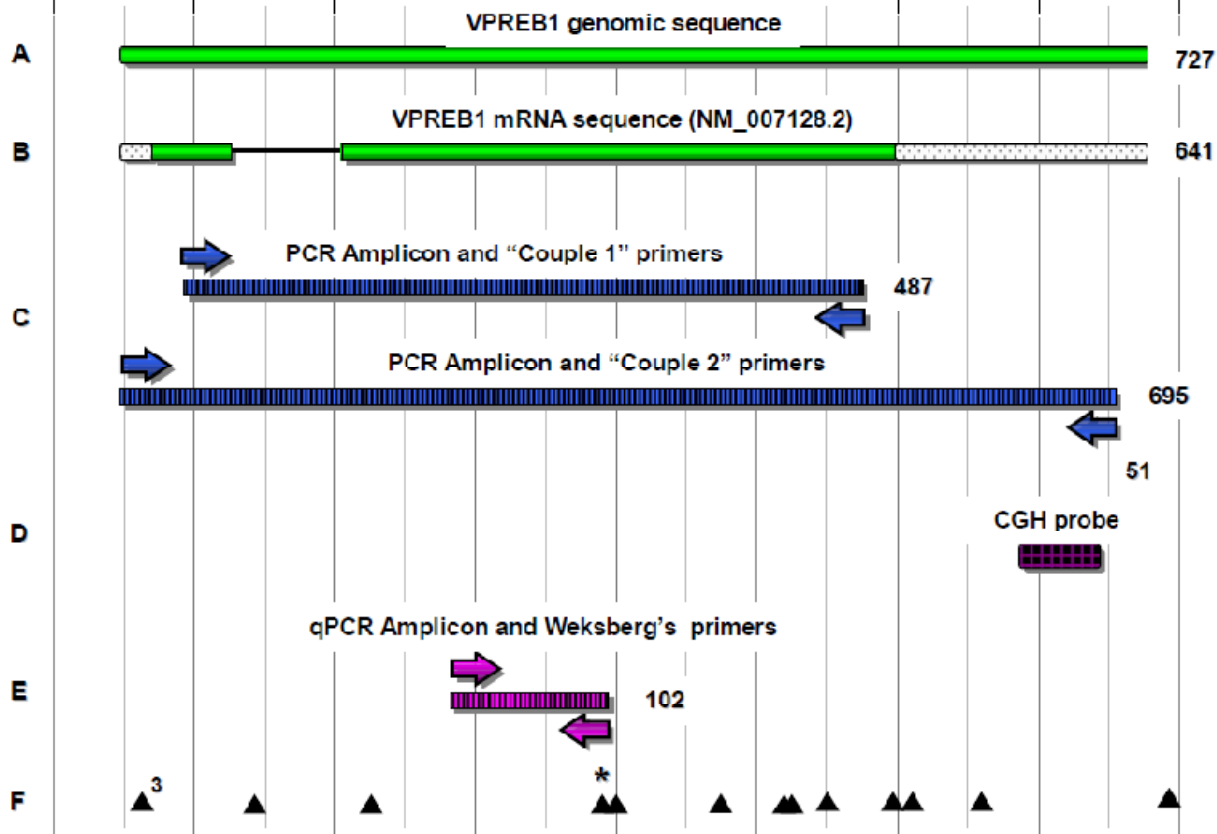

Supplement: MOESM2 [file 9451434]
